# Supplementary material for: Impact of daylight saving time on road traffic collision risk: a systematic review
Source: PubMed Central journal article supplement — BMJ Open. 2017 Jul 2;7(6):e014319. doi: 10.1136/bmjopen-2016-014319 (PMC5734262; doi:10.1136/bmjopen-2016-014319), 2017-07-02
Supplement: bmjopen-2016-014319supp001.pdf [file bmjopen-2016-014319supp001.pdf]

## Full Search Strategy for Ovid

1. daylight saving.mp
2. dst.mp
3. time change.mp.
4. road safety.mp.
5. road traffic.mp.
6. collision.mp.
7. crash.mp.
8. accident.mp.
9. 1 or 2 or 3
10. 4 or 5 or 6 or 7 or 8
- 11. 9 and 10**
